# Supplementary figures and images for: COVID-19-associated pulmonary aspergillosis (CAPA) might be associated with increased risk for pneumopleural fistula
Source: Springer Nature journal article supplement (doi:10.1007/s00134-023-07040-9), 2023-03-28

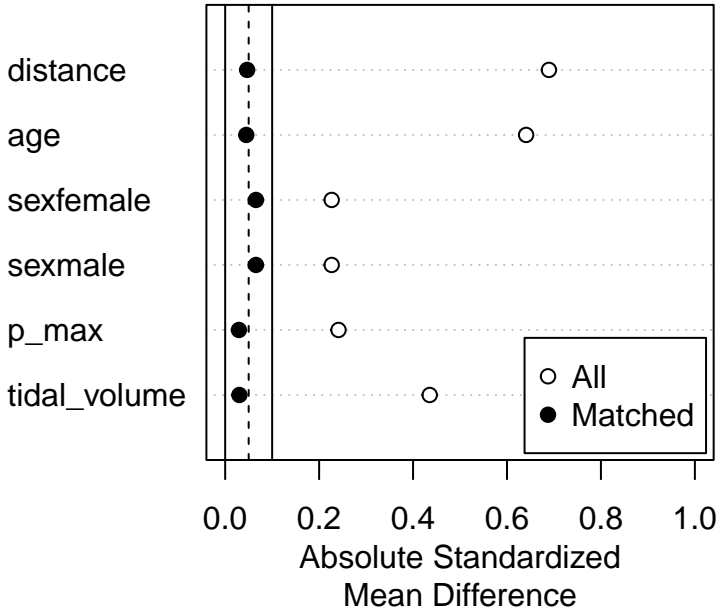

Supplement: MOESM3 [file 25167036]
